# Supplementary material for: Loxoprofen Overdose without Toxicity: Pharmacokinetics of Loxoprofen and Metabolites Analysed by Liquid Chromatography–Mass Spectrometry: A Case Report
Source: Research Square preprint supplement (doi:10.21203/rs.3.rs-8812672/v1), 2026-02-22
Supplement: Supplementary file 1 [file 2e53c837c869084ea691daf2.xlsx]

## Sheet: Sheet1
Table2: Plasma concentrations of loxoprofen, trans-OH metabolite, cis-OH metabolite after loxoprofen overdose.
	Time after loxoprofen overdose(hour)		2	8	16	24	32	48	56
	loxoprofen	(μg/mL)	159	21	0.55	0.4	0.01	0	0
	trans-OH body	(μg/mL)	64	14	0.79	0.19	0.17	0.05	0.03
	cis-OH body	(μg/mL)	29	5.9	0.35	0.11	0.09	0	0
