# Supplementary material for: Loxoprofen Overdose without Toxicity: Pharmacokinetics of Loxoprofen and Metabolites Analysed by Liquid Chromatography–Mass Spectrometry: A Case Report
Source: Research Square preprint supplement (doi:10.21203/rs.3.rs-8812672/v1), 2026-02-22
Supplement: Supplementary file 2 [file a2a295207b457a0b9f690718.xlsx]

## Sheet: Sheet1
Table1	Laboratory data during hospitalization.
	Time after loxoprofen overdose(hour)		2	8	32	56
	Blood cell count
	White blood cell	(103/μL)	10.22	7.69	9.21	8.71
	Red blood cell	(106/μL)	5.33	4.95	4.72	4.69
	Hemoglobin	(g/dL)	14.5	13.2	12.6	12.8
	Hematocrit	(%)	44.4	42.1	40.4	40
	Platelet	(103/μL)	208	212	186	194
	Biochemistry
	Sodium	(meq/L)	138	139	138	137
	Potassium	(meq/L)	3.9	4.3	3.9	4.1
	Chloride	(meq/L)	103	102	103	103
	Calcium	(mg/dL)	8.6	8.2	8.2	8.5
	Blood urea nitrogen	(mg/dL)	11	9	9	8
	Creatinine	(mg/dL)	0.44	0.45	0.51	0.5
	Aspartate minotransferase	(U/L)	28	23	26	22
	Alanine aminotransferase	(U/L)	29	25	24	21
	γ-glutamyltransferase	(U/L)	25	21	18	18
	Alkaline phosphatase	(U/L)	70	61	57	58
	Lactate dehydrogenase	(U/L)	215	172	151	130
	Total Bilirubin	(mg/dL)	0.2	0.4	0.9	0.8
	Creatine kinase	(U/L)	57	48	41	34
	Amylase	(U/L)	50	46	40	45
	Total protein	(g/dL)	7.2	6.1	5.8	5.9
	Albumin	(g/dL)	3.7	3.4	3.2	3.2
	C-reactive protein	(mg/dL)	0.41	0.35	0.61	1.61
